# Supplementary material for: Achillea moschata Wulfen: From Ethnobotany to Phytochemistry, Morphology, and Biological Activity
Source: MDPI journal article supplement (doi:10.3390/molecules27238318), 2022-11-29
Supplement: s1 [file s1]

## Supplementary Materials

**Table S1.** Plant species traditionally used in Chiesa in Valmalenco (Sondrio, Lombardy, Italy). Species are reported in decreasing order of citations.

| N. | Species                                        | Citations |
|----|------------------------------------------------|-----------|
| 1  | <i>Arnica montana</i> L. subsp. <i>montana</i> | 248       |
| 2  | <i>Vaccinium myrtillus</i> L.                  | 242       |
| 3  | <i>Achillea moschata</i> Wulfen                | 209       |
| 4  | <i>Taraxacum</i> spp.                          | 185       |
| 5  | <i>Sambucus nigra</i> L.                       | 177       |
| 6  | <i>Vaccinium vitis-idaea</i> L.                | 165       |
| 7  | <i>Rubus idaeus</i> L.                         | 164       |
| 8  | <i>Thymus</i> spp.                             | 151       |
| 9  | <i>Malva sylvestris</i> L.                     | 137       |
| 10 | <i>Pinus mugo</i> Turra                        | 133       |
| 11 | <i>Urtica dioica</i> L.                        | 112       |
| 12 | <i>Rosa canina</i> L.                          | 112       |
| 13 | <i>Fragaria vesca</i> L.                       | 107       |
| 14 | <i>Artemisia genipi</i> Weber                  | 101       |
| 15 | <i>Gentiana lutea</i> L.                       | 100       |
| 16 | <i>Hypericum perforatum</i> L.                 | 95        |
| 17 | <i>Juniperus communis</i> L.                   | 89        |
| 18 | <i>Achillea millefolium</i> L.                 | 83        |
| 19 | <i>Matricaria chamomilla</i> L.                | 77        |
| 20 | <i>Silene vulgaris</i> (Moench) Garcke         | 76        |
| 21 | <i>Blitum bonus-henricus</i> (L.) Rchb.        | 75        |
| 22 | <i>Calendula officinalis</i> L.                | 72        |
| 23 | <i>Rubus ulmifolius</i> Schott                 | 64        |
| 24 | <i>Larix decidua</i> Mill.                     | 63        |
| 25 | <i>Pinus cembra</i> L.                         | 56        |
| 26 | <i>Plantago major</i> L.                       | 41        |
| 27 | <i>Rumex alpinus</i> L.                        | 35        |
| 28 | <i>Picea abies</i> (L.) H.Karst.               | 34        |
| 29 | <i>Salvia officinalis</i> L.                   | 33        |
| 30 | <i>Aruncus dioicus</i> (Walter) Fernald        | 30        |
| 31 | <i>Equisetum arvense</i> L.                    | 23        |
| 32 | <i>Polypodium vulgare</i> L.                   | 21        |
| 33 | <i>Plantago lanceolata</i> L.                  | 20        |
| 34 | <i>Rumex acetosa</i> L.                        | 19        |
| 35 | <i>Mentha x piperita</i> L.                    | 16        |
| 36 | <i>Carlina acaulis</i> L.                      | 16        |

|    |                                                                        |    |
|----|------------------------------------------------------------------------|----|
| 37 | <i>Euphrasia rostkoviana</i> Hayne                                     | 16 |
| 38 | <i>Ribes rubrum</i> L.                                                 | 16 |
| 39 | <i>Corylus avellana</i> L.                                             | 16 |
| 40 | <i>Prunus spinosa</i> L.                                               | 16 |
| 41 | <i>Artemisia absinthium</i> L.                                         | 15 |
| 42 | <i>Humulus lupulus</i> L.                                              | 14 |
| 43 | <i>Rhododendron ferrugineum</i> L.                                     | 14 |
| 44 | <i>Cetraria islandica</i> (L.) Ach. subsp. <i>islandica</i> ("Lichen") | 14 |
| 45 | <i>Arctium lappa</i> L.                                                | 12 |
| 46 | <i>Prunus avium</i> L.                                                 | 12 |
| 47 | <i>Chelidonium majus</i> L.                                            | 12 |
| 48 | <i>Betula pendula</i> Roth                                             | 12 |
| 49 | <i>Solanum tuberosum</i> L.                                            | 11 |
| 50 | <i>Brassica oleracea</i> L.                                            | 11 |
| 51 | <i>Melissa officinalis</i> L.                                          | 11 |
| 52 | <i>Castanea sativa</i> Mill.                                           | 10 |
| 53 | <i>Fraxinus excelsior</i> L.                                           | 8  |
| 54 | <i>Ribes nigrum</i> L.                                                 | 8  |
| 55 | <i>Juglans regia</i> L.                                                | 8  |
| 56 | <i>Lavandula angustifolia</i> Mill.                                    | 8  |
| 57 | <i>Allium sativum</i> L.                                               | 8  |
| 58 | <i>Bistorta officinalis</i> Delarbre                                   | 7  |
| 59 | <i>Tilia</i> sp. pl.                                                   | 7  |
| 60 | <i>Rosmarinus officinalis</i> L.                                       | 7  |
| 61 | <i>Achillea nana</i> L.                                                | 6  |
| 62 | <i>Crataegus monogyna</i> Jacq.                                        | 6  |
| 63 | <i>Nasturtium officinale</i> R. Br.                                    | 6  |
| 64 | <i>Secale cereale</i> L.                                               | 6  |
| 65 | <i>Zea mays</i> L.                                                     | 6  |
| 66 | <i>Linum usitatissimum</i> L.                                          | 5  |
| 67 | <i>Lamium album</i> L.                                                 | 5  |
| 68 | <i>Nigritella rhellicani</i> Teppner et E. Klein                       | 5  |
| 69 | <i>Carum carvi</i> L. subsp. <i>carvi</i>                              | 5  |
| 70 | <i>Sorbus aucuparia</i> L.                                             | 5  |
| 71 | <i>Rheum officinale</i> L.                                             | 5  |
| 72 | <i>Alnus viridis</i> (Chaix) DC.                                       | 5  |
| 73 | <i>Polygonum aviculare</i> L.                                          | 4  |
| 74 | <i>Triticum aestivum</i> L.                                            | 4  |
| 75 | <i>Trifolium pratense</i> L.                                           | 4  |
| 76 | <i>Gentiana acaulis</i> L.                                             | 4  |

|     |                                            |   |
|-----|--------------------------------------------|---|
| 77  | <i>Hordeum vulgare</i> L.                  | 4 |
| 78  | <i>Chaerophyllum aromaticum</i> L.         | 4 |
| 79  | <i>Laurus nobilis</i> L.                   | 4 |
| 80  | <i>Allium schoenoprasum</i> L.             | 3 |
| 81  | <i>Gentiana verna</i> L.                   | 3 |
| 82  | <i>Capsicum annuum</i> L.                  | 3 |
| 83  | <i>Robinia pseudoacacia</i> L.             | 3 |
| 84  | <i>Ocimum basilicum</i> L.                 | 3 |
| 85  | <i>Sambucus racemosa</i> L.                | 3 |
| 86  | <i>Artemisia vulgaris</i> L.               | 3 |
| 87  | <i>Calluna vulgaris</i> (L.) Hull          | 3 |
| 88  | <i>Carduus nutans</i> L.                   | 3 |
| 89  | <i>Cinnamomum verum</i> J. Presl           | 3 |
| 90  | <i>Aloe vera</i> (L.) Burm. fil.           | 3 |
| 91  | <i>Solanum lycopersicum</i> L.             | 3 |
| 92  | <i>Olea europaea</i> L.                    | 3 |
| 93  | <i>Pinus sylvestris</i> L.                 | 3 |
| 94  | <i>Prunus domestica</i> L.                 | 3 |
| 95  | <i>Oxalis acetosella</i> L.                | 3 |
| 96  | <i>Malus x domestica</i> Borkh.            | 3 |
| 97  | <i>Leontopodium alpinum</i> Cass.          | 3 |
| 98  | <i>Berberis vulgaris</i> L.                | 2 |
| 99  | <i>Sedum album</i> L.                      | 2 |
| 100 | <i>Elymus repens</i> L. Gould              | 2 |
| 101 | <i>Heracleum sphondylium</i> L.            | 2 |
| 102 | <i>Panicum miliaceum</i> L.                | 2 |
| 103 | <i>Brassica rapa</i> L.                    | 2 |
| 104 | <i>Salix alba</i> L.                       | 2 |
| 105 | <i>Allium cepa</i> L.                      | 2 |
| 106 | <i>Fagus sylvatica</i> L.                  | 2 |
| 107 | <i>Capsella bursa-pastoris</i> (L.) Medik. | 2 |
| 108 | <i>Ficus carica</i> L.                     | 2 |
| 109 | <i>Ricinus communis</i> L.                 | 2 |
| 110 | <i>Phyteuma betonicifolium</i> Vill.       | 2 |
| 111 | <i>Lepidium sativum</i> L.                 | 2 |
| 112 | <i>Verbascum thapsus</i> L.                | 2 |
| 113 | <i>Epilobium montanum</i> L.               | 2 |
| 114 | <i>Matricaria discoidea</i> DC.            | 2 |
| 115 | <i>Gentiana</i> spp.                       | 2 |
| 116 | <i>Viola odorata</i> L.                    | 1 |

|     |                                                              |             |
|-----|--------------------------------------------------------------|-------------|
| 117 | <i>Galium odoratum</i> (L.) Scop.                            | 1           |
| 118 | <i>Carlina</i> spp.                                          | 1           |
| 119 | <i>Potentilla indica</i> (Andrews) Th. Wolf                  | 1           |
| 120 | <i>Pinus</i> sp. pl.                                         | 1           |
| 121 | <i>Lupinus albus</i> L.                                      | 1           |
| 122 | <i>Oryza sativa</i> L.                                       | 1           |
| 123 | <i>Arctostaphylos uva-ursi</i> (L.) Spreng.                  | 1           |
| 124 | <i>Physalis alkekengi</i> L.                                 | 1           |
| 125 | <i>Aesculus hippocastanum</i> L.                             | 1           |
| 126 | <i>Ajuga pyramidalis</i> L.                                  | 1           |
| 127 | <i>Cirsium</i> spp.                                          | 1           |
| 128 | <i>Abies alba</i> Mill.                                      | 1           |
| 129 | <i>Pteridium aquilinum</i> (L.) Kuhn subsp. <i>aquilinum</i> | 1           |
| 130 | <i>Prunus cerasus</i> L.                                     | 1           |
| 131 | <i>Tagetes</i> spp.                                          | 1           |
| 132 | <i>Daphne mezereum</i> L. subsp. <i>mezereum</i>             | 1           |
| 133 | <i>Alchemilla pentaphyllea</i> L.                            | 1           |
| 134 | <i>Cichorium intybus</i> L.                                  | 1           |
| 135 | <i>Alliaria petiolata</i> (M.Bieb.) Cavara et Grande         | 1           |
| 136 | <i>Tropaeolum majus</i> L.                                   | 1           |
| 137 | <i>Sempervivum tectorum</i> L.                               | 1           |
| 138 | <i>Diplotaxis tenuifolia</i> (L.) DC.                        | 1           |
| 139 | <i>Cucurbita maxima</i> Duchesne                             | 1           |
| 140 | <i>Veratrum album</i> L.                                     | 1           |
| 141 | <i>Nicotiana tabacum</i> L.                                  | 1           |
| 142 | <i>Verbena officinalis</i> L.                                | 1           |
| 143 | <i>Foeniculum vulgare</i> Mill.                              | 1           |
| 144 | <i>Vitis vinifera</i> L.                                     | 1           |
| 145 | <i>Sorbus aria</i> (L.) Crantz                               | 1           |
| 146 | <i>Allium ursinum</i> L.                                     | 1           |
| 147 | <i>Fagopyrum esculentum</i> Moench                           | 1           |
| 148 | <i>Sedum album</i> L.                                        | 1           |
|     |                                                              |             |
|     | <b>Total</b>                                                 | <b>3870</b> |

**Table S2.** Plant species used in the therapeutic field in Chiesa in Valmalenco (Sondrio, Lombardy, Italy). Species are reported in decreasing order of citations.

| N. | Species                                                                | Citations |
|----|------------------------------------------------------------------------|-----------|
| 1  | <i>Arnica montana</i> L. subsp. <i>montana</i>                         | 248       |
| 2  | <i>Achillea moschata</i> Wulfen                                        | 132       |
| 3  | <i>Malva sylvestris</i> L.                                             | 115       |
| 4  | <i>Pinus mugo</i> Turra                                                | 96        |
| 5  | <i>Hypericum perforatum</i> L.                                         | 93        |
| 6  | <i>Achillea millefolium</i> L.                                         | 70        |
| 7  | <i>Matricaria chamomilla</i> L.                                        | 70        |
| 8  | <i>Sambucus nigra</i> L.                                               | 64        |
| 9  | <i>Thymus</i> spp.                                                     | 62        |
| 10 | <i>Calendula officinalis</i> L.                                        | 62        |
| 11 | <i>Taraxacum</i> spp.                                                  | 34        |
| 12 | <i>Gentiana lutea</i> L.                                               | 31        |
| 13 | <i>Plantago major</i> L.                                               | 26        |
| 14 | <i>Rosa canina</i> L.                                                  | 25        |
| 15 | <i>Equisetum arvense</i> L.                                            | 23        |
| 16 | <i>Juniperus communis</i> L.                                           | 22        |
| 17 | <i>Vaccinium myrtillus</i> L.                                          | 21        |
| 18 | <i>Vaccinium vitis-idaea</i> L.                                        | 20        |
| 19 | <i>Rumex alpinus</i> L.                                                | 18        |
| 20 | <i>Salvia officinalis</i> L.                                           | 16        |
| 21 | <i>Picea abies</i> (L.) H.Karst.                                       | 16        |
| 22 | <i>Euphrasia rostkoviana</i> Hayne                                     | 15        |
| 23 | <i>Urtica dioica</i> L.                                                | 14        |
| 24 | <i>Cetraria islandica</i> (L.) Ach. subsp. <i>islandica</i> ("Lichen") | 14        |
| 25 | <i>Artemisia genipi</i> Weber                                          | 13        |
| 26 | <i>Larix decidua</i> Mill.                                             | 13        |
| 27 | <i>Chelidonium majus</i> L.                                            | 12        |
| 28 | <i>Pinus cembra</i> L.                                                 | 11        |
| 29 | <i>Arctium lappa</i> L.                                                | 9         |
| 30 | <i>Plantago lanceolata</i> L.                                          | 8         |
| 31 | <i>Brassica oleracea</i> L.                                            | 8         |
| 32 | <i>Melissa officinalis</i> L.                                          | 8         |
| 33 | <i>Solanum tuberosum</i> L.                                            | 7         |
| 34 | <i>Allium sativum</i> L.                                               | 6         |
| 35 | <i>Artemisia absinthium</i> L.                                         | 6         |
| 36 | <i>Linum usitatissimum</i> L.                                          | 5         |
| 37 | <i>Chaerophyllum aromaticum</i> L.                                     | 4         |

|    |                                             |             |
|----|---------------------------------------------|-------------|
| 38 | <i>Rheum officinale</i> Baill.              | 4           |
| 39 | <i>Triticum aestivum</i> L.                 | 3           |
| 40 | <i>Capsicum annuum</i> L.                   | 3           |
| 41 | <i>Tilia</i> sp. pl.                        | 3           |
| 42 | <i>Cinnamomum verum</i> J. Presl            | 3           |
| 43 | <i>Hordeum vulgare</i> L.                   | 3           |
| 44 | <i>Olea europaea</i> L.                     | 3           |
| 45 | <i>Gentiana verna</i> L.                    | 3           |
| 46 | <i>Ricinus communis</i> L.                  | 2           |
| 47 | <i>Ribes nigrum</i> L.                      | 2           |
| 48 | <i>Fraxinus excelsior</i> L.                | 2           |
| 49 | <i>Pinus sylvestris</i> L.                  | 2           |
| 50 | <i>Panicum miliaceum</i> L.                 | 2           |
| 51 | <i>Prunus avium</i> L.                      | 2           |
| 52 | <i>Secale cereale</i> L.                    | 2           |
| 53 | <i>Verbascum thapsus</i> L.                 | 2           |
| 54 | <i>Elymus repens</i> L. Gould               | 2           |
| 55 | <i>Capsella bursa-pastoris</i> (L.) Medik.  | 2           |
| 56 | <i>Mentha x piperita</i> L.                 | 2           |
| 57 | <i>Veratrum album</i> L.                    | 1           |
| 58 | <i>Nicotiana tabacum</i> L.                 | 1           |
| 59 | <i>Arctostaphylos uva-ursi</i> (L.) Spreng. | 1           |
| 60 | <i>Epilobium montanum</i> L.                | 1           |
| 61 | <i>Oryza sativa</i> L.                      | 1           |
| 62 | <i>Pinus</i> sp. pl.                        | 1           |
| 63 | <i>Verbena officinalis</i> L.               | 1           |
| 64 | <i>Sempervivum tectorum</i> L.              | 1           |
| 65 | <i>Nasturtium officinale</i> R. Br.         | 1           |
| 66 | <i>Betula pendula</i> Roth                  | 1           |
| 67 | <i>Aloe vera</i> (L.) Burm.fil.             | 1           |
| 68 | <i>Sorbus aucuparia</i> L.                  | 1           |
| 69 | <i>Aruncus dioicus</i> (Walter) Fernald     | 1           |
| 70 | <i>Gentiana</i> spp.                        | 1           |
| 71 | <i>Tagetes</i> spp.                         | 1           |
| 72 | <i>Lupinus albus</i> L.                     | 1           |
| 73 | <i>Humulus lupulus</i> L.                   | 1           |
| 74 | <i>Sedum album</i> L.                       | 1           |
|    |                                             |             |
|    | <b>Total</b>                                | <b>1482</b> |

**Table S3.** Summary of the questionnaire, in Italian and in English languages, proposed during the interviews to the local community in Chiesa in Valmalenco (Sondrio, Lombardy, Italy).

## QUESTIONARIO

### (intervista aperta o semi-strutturata)

#### A) INFORMAZIONI GENERALI

1. Chi intervista
2. Data e luogo intervista
3. Intermediario
4. Intervistato
5. Età
6. Grado di parentela
7. Professione
8. Recapito dell'informatore o dell'intermediario

#### B) INFORMAZIONI SULLE PIANTE E LORO USI

1. Usi o conosci qualche pianta?
2. Nome comune della pianta (*anche dialettale*)
3. Come la usi? Per cucinare o per curarti?
4. Per quale disturbo la usi? (*medicinale*)
5. Quale parte della pianta usi?
6. Come la prepari?
7. Come la somministri? (*medicinale*)
8. Dove e quando la raccogli?
9. Da chi hai imparato a farne uso?
10. La usi personalmente o ne hai solo sentito parlare?
11. È un uso ancora attuale o passato?

**QUESTIONNAIRE**  
**(open and semi-structured interview)**

**C) GENERAL INFORMATION**

- 9. Interviewer's name and surname
- 10. Date and place of the interview
- 11. Mediator
- 12. Informant's name and surname
- 13. Age
- 14. Degree of kinship
- 15. Job (current or past)
- 16. Mediator or informant's phone number

**D) INFORMATION ABOUT PLANT SPECIES AND THEIR TRADITIONAL USES**

- 12. Do you use or know any plant species?
- 13. Common name of the plant species (*even its dialectal name*)
- 14. How do you use it? Is it useful for cooking or for medicinal purposes?
- 15. What ailment do you use it for? (*therapeutic field of use*)
- 16. Which plant's part do you use?
- 17. How do you prepare it?
- 18. How do you administer it? (*therapeutic field of use*)
- 19. Where and when do you collect it?
- 20. Who did you learn to use from?
- 21. Do you use it personally or have you just heard of it?
- 22. Is it still a current or past use?
